# Supplementary material for: Deleterious Rare Variants Reveal Risk for Loss of GABAA Receptor Function in Patients with Genetic Epilepsy and in the General Population
Source: PubMed Central journal article supplement (PMC5021343; doi:10.1371/journal.pone.0162883), 2016-09-13
Supplement: pone.0162883.s003.pdf [file pone.0162883.s003.pdf]

S1 TABLE

No Effects of GEC variants on the expression properties of GABA<sub>A</sub> receptors

| Gene/<br>Receptor                            | Variant         | Surface                |                     |                     | Total                 |                    |                     |
|----------------------------------------------|-----------------|------------------------|---------------------|---------------------|-----------------------|--------------------|---------------------|
|                                              |                 | $\alpha$               | $\beta$             | $\gamma$            | $\alpha$              | $\beta$            | $\gamma$            |
| <i>GABRA1</i><br>/ $\alpha 1\beta 2\gamma 2$ | $\alpha 1T20I$  | 0.97 ±<br>0.02 (3)     | 1.21 ±<br>0.12 (3)  | 1.03 ±<br>0.08 (3)  | 1.02 ±<br>0.05 (3)    | 0.93 ±<br>0.14 (3) | 1.00 ±<br>0.09 (3)  |
| <i>GABRA4</i><br>/ $\alpha 4\beta 2\gamma 2$ | $\alpha 4A19T$  | 1.16 ±<br>0.04 (3)     | 1.10 ±<br>0.07 (4)  | 0.82 ±<br>0.06 (4)  | 1.24 ±<br>0.09 (3)    | 1.06 ±<br>0.15 (3) | 0.95 ±<br>0.03 (4)  |
|                                              | $\alpha 4H372P$ | 0.88 ±<br>0.02 (4)     | 0.96 ±<br>0.02 (3)  | 0.93 ±<br>0.03 (5)  | 0.80 ±<br>0.05 (3)    | 0.99 ±<br>0.19 (3) | 0.91 ±<br>0.08 (4)  |
| <i>GABRA5</i><br>/ $\alpha 5\beta 3\gamma 2$ | $\alpha 5V204I$ | 1.04 ±<br>0.14 (8)     | 0.95 ±<br>0.06 (17) | 1.13 ±<br>0.09 (13) | 0.97 ±<br>0.10<br>(9) | 0.84 ±<br>0.05 (3) | 1.05 ±<br>0.06 (11) |
|                                              | $\alpha 5W280R$ | 0.667 ±<br>0.06 (5)    | 0.83 ±<br>0.04 (10) | 0.94 ±<br>0.07 (13) | 0.80 ±<br>0.08 (5)    | 0.77 ±<br>0.10 (4) | 0.88 ±<br>0.05 (11) |
|                                              | $\alpha 5S402A$ | 0.81 ±<br>0.11 (3)     | 0.90 ±<br>0.10 (3)  | 1.03 ±<br>0.01 (3)  | 0.97 ±<br>0.16 (3)    | 1.11 ±<br>0.05 (3) | 0.98 ±<br>0.02 (3)  |
|                                              | $\alpha 5P453L$ | 0.85 ±<br>0.07<br>(11) | 0.91 ±<br>0.07 (11) | 1.01 ±<br>0.10 (7)  | 0.92 ±<br>0.06 (10)   | 1.16 ±<br>0.22 (4) | 0.94 ±<br>0.10 (9)  |
| <i>GABRA6</i><br>/ $\alpha 6\beta 2\gamma 2$ | $\alpha 6Q237R$ | 0.96 ±<br>0.05 (5)     | 1.09 ±<br>0.06 (6)  | 0.93 ±<br>0.04 (6)  | 1.00 ±<br>0.10 (6)    | 1.01 ±<br>0.08 (6) | 1.00 ±<br>0.04 (5)  |
| <i>GABRB1</i><br>/ $\alpha 1\beta 1\gamma 2$ | $\beta 1H421Q$  | 1.12 ±<br>0.12 (3)     | 1.58 ±<br>0.39 (4)  | 1.10 ±<br>0.07 (3)  | 1.00 ±<br>0.21 (3)    | 1.30 ±<br>0.18 (3) | 0.84 ±<br>0.01 (3)  |
| <i>GABRB2</i><br>/ $\alpha 1\beta 2\gamma 2$ | $\beta 2R293W$  | 0.83 ±<br>0.03 (3)     | 0.95 ±<br>0.10 (3)  | 1.30 ±<br>0.12 (3)  | 1.04 ±<br>0.07 (3)    | 1.03 ±<br>0.15 (3) | 1.10 ±<br>0.02 (3)  |
|                                              | $\beta 2R354C$  | 0.95 ±<br>0.10 (4)     | 1.03 ±<br>0.09 (4)  | 1.27 ±<br>0.10 (4)  | 1.22 ±<br>0.09 (4)    | 1.06 ±<br>0.01 (3) | 0.86 ±<br>0.02 (3)  |

|                                              |                 |                        |                        |                        |                        |                        |                        |
|----------------------------------------------|-----------------|------------------------|------------------------|------------------------|------------------------|------------------------|------------------------|
| <i>GABRG1</i><br>/ $\alpha 1\beta 2\gamma 1$ | $\gamma 1S16R$  | 1.03 $\pm$<br>0.24 (4) | 0.89 $\pm$<br>0.06 (5) | 1.06 $\pm$<br>0.03 (5) | 0.71 $\pm$<br>0.07 (3) | 1.02 $\pm$<br>0.13 (5) | 0.91 $\pm$<br>0.09 (5) |
|                                              | $\gamma 1S414N$ | 1.04 $\pm$<br>0.16 (5) | 1.28 $\pm$<br>0.17 (6) | 1.22 $\pm$<br>0.17 (6) | 0.85 $\pm$<br>0.06 (5) | 1.01 $\pm$<br>0.14 (4) | 0.98 $\pm$<br>0.30 (3) |
| <i>GABRG3</i><br>/ $\alpha 5\beta 3\gamma 3$ | $\gamma 3A303T$ | 1.22 $\pm$<br>0.18 (3) | 1.02 $\pm$<br>0.14 (4) | 0.74 $\pm$<br>0.14 (5) | 0.81 $\pm$<br>0.02 (3) | 1.34 $\pm$<br>0.27 (4) | 1.30 $\pm$<br>0.28 (4) |

Values are expressed as mean  $\pm$  S.E.M.  $n$  = parenthesis. No significant differences from wild type (wt) after analysis of number of comparisons per gene by using one-way ANOVA with Dunnett's multiple comparisons test and unpaired t test (two-tailed) for single comparisons ( $p > 0.05$ ). GEC = genetic epilepsy case.
