# Supplementary material for: Deleterious Rare Variants Reveal Risk for Loss of GABAA Receptor Function in Patients with Genetic Epilepsy and in the General Population
Source: PubMed Central journal article supplement (PMC5021343; doi:10.1371/journal.pone.0162883), 2016-09-13
Supplement: pone.0162883.s004.pdf [file pone.0162883.s004.pdf]

S2 TABLE

**No Effects of ESP variants on the expression properties of  $\alpha 1\beta 3\gamma 2$  GABA<sub>A</sub> receptors**

| Gene          | Variant         | Surface            |                    |                    | Total                 |                    |                    |
|---------------|-----------------|--------------------|--------------------|--------------------|-----------------------|--------------------|--------------------|
|               |                 | $\alpha$           | $\beta$            | $\gamma$           | $\alpha$              | $\beta$            | $\gamma$           |
| <i>GABRA1</i> | $\alpha 1D9E$   | 1.09 ±<br>0.11 (3) | 0.98 ±<br>0.09 (3) | 1.12 ±<br>0.03 (3) | 0.82 ±<br>0.07 (3)    | 0.74 ±<br>0.11 (3) | 1.14 ±<br>0.09 (3) |
|               | $\alpha 1P29S$  | 0.64 ±<br>0.10 (3) | 0.87 ±<br>0.08 (3) | 0.99 ±<br>0.25 (3) | 0.36 ±<br>0.02 (3)    | 0.51 ±<br>0.12 (3) | 0.91 ±<br>0.33 (3) |
|               | $\alpha 1H129Y$ | 0.90 ±<br>0.31 (3) | 0.90 ±<br>0.18 (3) | 1.15 ±<br>0.23 (3) | 0.89 ±<br>0.03 (3)    | 0.64 ±<br>0.15 (3) | 0.82 ±<br>0.20 (3) |
|               | $\alpha 1R147W$ | 1.08 ±<br>0.20 (3) | 1.05 ±<br>0.15 (3) | 1.26 ±<br>0.27 (3) | 0.85 ±<br>0.07<br>(3) | 0.65 ±<br>0.15 (3) | 0.89 ±<br>0.29 (3) |
|               | $\alpha 1T371I$ | 1.0 ±<br>0.17 (3)  | 0.91 ±<br>0.14 (3) | 0.97 ±<br>0.12 (3) | 0.76 ±<br>0.05 (3)    | 0.54 ±<br>0.08 (3) | 0.80 ±<br>0.14 (3) |
|               | $\alpha 1D383N$ | 1.20 ±<br>0.22 (3) | 0.76 ±<br>0.04 (3) | 1.21 ±<br>0.15 (3) | 1.04 ±<br>0.11 (3)    | 0.73 ±<br>0.05 (3) | 1.16 ±<br>0.37 (3) |
|               | $\alpha 1P409S$ | 1.05 ±<br>0.18 (3) | 1.34 ±<br>0.42 (3) | 1.11 ±<br>0.17 (3) | 1.16 ±<br>0.31 (3)    | 1.11 ±<br>0.46 (3) | 0.95 ±<br>0.32 (3) |
|               | $\alpha 1K410R$ | 1.10 ±<br>0.19 (3) | 0.96 ±<br>0.13 (3) | 1.18 ±<br>0.19 (3) | 1.14 ±<br>0.23 (3)    | 0.69 ±<br>0.10 (3) | 0.88 ±<br>0.21 (3) |
|               | $\alpha 1T441M$ | 1.08 ±<br>0.17 (3) | 0.88 ±<br>0.18 (3) | 1.15 ±<br>0.39 (3) | 1.24 ±<br>0.55 (3)    | 0.91 ±<br>0.20 (3) | 0.96 ±<br>0.30 (3) |
| <i>GABRB3</i> | $\beta 3R194Q$  | 0.96 ±<br>0.05 (4) | 0.77 ±<br>0.09 (4) | 1.04 ±<br>0.14 (4) | 0.94 ±<br>0.12 (4)    | 0.40 ±<br>0.12 (3) | 0.71 ±<br>0.23 (4) |
|               | $\beta 3D197N$  | 1.04 ±<br>0.52 (3) | 1.06 ±<br>0.21 (3) | 1.15 ±<br>0.11 (3) | 0.78 ±<br>0.03 (3)    | 0.42 ±<br>0.22 (3) | 0.61 ±<br>0.19 (3) |

|               |                 |                    |                    |                    |                    |                    |                    |
|---------------|-----------------|--------------------|--------------------|--------------------|--------------------|--------------------|--------------------|
|               | $\beta$ 3V200I  | 0.88 ±<br>0.09 (4) | 0.93 ±<br>0.15 (3) | 1.07 ±<br>0.20 (3) | 0.89 ±<br>0.14 (3) | 0.81 ±<br>0.35 (3) | 1.14 ±<br>0.49 (4) |
|               | $\beta$ 3R221K  | 1.54 ±<br>0.48 (4) | 0.97 ±<br>0.11 (3) | 0.78 ±<br>0.16 (3) | 0.76 ±<br>0.07 (3) | 0.74 ±<br>0.28 (3) | 1.11 ±<br>0.50(4)  |
|               | $\beta$ 3R238W  | 1.13 ±<br>0.21 (4) | 0.65 ±<br>0.33 (5) | 0.85 ±<br>0.23 (4) | 1.06 ±<br>0.35 (4) | 0.41 ±<br>0.32 (3) | 1.07 ±<br>0.69 (4) |
|               | $\beta$ 3D387N  | 0.86 ±<br>0.05 (4) | 1.09 ±<br>0.24 (4) | 1.10 ±<br>0.07 (4) | 0.78 ±<br>0.16 (4) | 1.56 ±<br>1.15 (3) | 1.22 ±<br>0.34(4)  |
|               | $\beta$ 3I448V  | 1.11 ±<br>0.11 (4) | 1.54 ±<br>0.16 (4) | 0.99 ±<br>0.17 (4) | 0.71 ±<br>0.07 (4) | 2.29 ±<br>1.13 (3) | 1.36 ±<br>0.52 (4) |
| <i>GABRG2</i> | $\gamma$ 2L57F  | 1.29 ±<br>0.04 (4) | 1.52 ±<br>0.29 (4) | 1.04 ±<br>0.13 (4) | 1.06 ±<br>0.08 (4) | 0.92 ±<br>0.29 (3) | 1.47 ±<br>0.46 (3) |
|               | $\gamma$ 2A402T | 1.11 ±<br>0.13 (4) | 1.40 ±<br>0.30 (4) | 1.13 ±<br>0.15 (4) | 1.10 ±<br>0.07 (4) | 1.47 ±<br>0.44 (3) | 1.76 ±<br>0.36 (3) |

Values are expressed as mean ± S.E.M of  $n = 3-5$ , with differences among means not statistically significant ( $p > 0.05$ , one-way ANOVA with Dunnett's multiple comparisons test). ESP = Exome Sequencing Project.
