# Supplementary material for: Deleterious Rare Variants Reveal Risk for Loss of GABAA Receptor Function in Patients with Genetic Epilepsy and in the General Population
Source: PubMed Central journal article supplement (PMC5021343; doi:10.1371/journal.pone.0162883), 2016-09-13
Supplement: pone.0162883.s005.pdf [file pone.0162883.s005.pdf]

**S3 TABLE**

| <b>Distribution of missense <i>GABR</i> variants by deleteriousness and effect on GABA-evoked currents</b> |                                                                              |                                                                                                              |       |
|------------------------------------------------------------------------------------------------------------|------------------------------------------------------------------------------|--------------------------------------------------------------------------------------------------------------|-------|
|                                                                                                            | <b>Damaging</b>                                                              | <b>Benign or possibly damaging</b>                                                                           |       |
| <b>Reduced current</b>                                                                                     | W280R<br>R293W<br>A303T<br>R354C<br>H129Y<br>T441M<br>V200I<br>I448V<br>L57F | H372P<br>V204I<br>Q237R<br>P29S<br>P409S<br>R194Q<br>R221K<br>R238W<br>D387N                                 |       |
| <b>No effect</b>                                                                                           | <b>R147W</b>                                                                 | T20I<br>P453L<br>A19T<br>S402A<br>H421Q<br>S16R<br>S414N<br>D9E<br>T371I<br>D383N<br>K410R<br>D197N<br>A402T |       |
| Data analyzed                                                                                              | damaging                                                                     | benign                                                                                                       | Total |
| I effect                                                                                                   | 9                                                                            | 9                                                                                                            | 18    |
| no-effect                                                                                                  | 1                                                                            | 13                                                                                                           | 14    |
| Total                                                                                                      | 10                                                                           | 22                                                                                                           | 32    |
| Fisher's exact test                                                                                        |                                                                              |                                                                                                              |       |
| P value                                                                                                    | 0.0189                                                                       |                                                                                                              |       |
| P value summary                                                                                            | *                                                                            |                                                                                                              |       |
| One- or two-tailed                                                                                         | Two-tailed                                                                   |                                                                                                              |       |
| Statistically significant? (alpha<0.05)                                                                    | Yes                                                                          |                                                                                                              |       |
