# Supplementary material for: Deleterious Rare Variants Reveal Risk for Loss of GABAA Receptor Function in Patients with Genetic Epilepsy and in the General Population
Source: PubMed Central journal article supplement (PMC5021343; doi:10.1371/journal.pone.0162883), 2016-09-13
Supplement: pone.0162883.s007.pdf [file pone.0162883.s007.pdf]

S5 TABLE

| Distribution of missense <i>GABR</i> variants by GABA <sub>A</sub> receptor structural domains and receptor gating |                                                                                                          |                                                                                                      |       |
|--------------------------------------------------------------------------------------------------------------------|----------------------------------------------------------------------------------------------------------|------------------------------------------------------------------------------------------------------|-------|
|                                                                                                                    | NT/TM                                                                                                    | SP/CL                                                                                                |       |
| Gating defect                                                                                                      | W280R<br>R293W<br>A303T<br>T441M<br>V204I<br>Q237R<br>R194Q<br>R221K<br>R238W<br>R147W<br>P453L<br>D197N | T20I<br>R354C<br>D387N                                                                               |       |
| No effect                                                                                                          | H129Y<br>V200I<br>I448V<br>P29S<br>L57F                                                                  | H372P<br>P409S<br>A19T<br>S402A<br>H421Q<br>S16R<br>S414N<br>D9E<br>T371I<br>D383N<br>K410R<br>A402T |       |
| Data analyzed                                                                                                      | NT-TM                                                                                                    | SP-CL                                                                                                | Total |
| Gating effect                                                                                                      | 12                                                                                                       | 3                                                                                                    | 15    |
| no-effect                                                                                                          | 5                                                                                                        | 12                                                                                                   | 17    |
| Total                                                                                                              | 17                                                                                                       | 15                                                                                                   | 32    |
| Fisher's exact test                                                                                                |                                                                                                          |                                                                                                      |       |
| P value                                                                                                            | 0.0060                                                                                                   |                                                                                                      |       |
| P value summary                                                                                                    | **                                                                                                       |                                                                                                      |       |
| One- or two-tailed                                                                                                 | Two-tailed                                                                                               |                                                                                                      |       |
| Statistically significant? (alpha<0.05)                                                                            | Yes                                                                                                      |                                                                                                      |       |

NT = N-terminal. TM = transmembrane. SP = signal peptide. CL = M3/M4 cytoplasmic loop.
